# Supplementary material for: Self-assembly behavior of oligo(ethylene glycol) substituted polycaprolactone homopolymers
Source: Royal Society of Chemistry journal article supplement (doi:10.1039/d1py00483b), 2021-01-01
Supplement: d1py00483b1.pdf [file d1py00483b1.pdf]

# Self-Assembly Behavior of Oligo(ethylene glycol) Substituted Polycaprolactone Homopolymers

Erika L. Calubaquib,<sup>a</sup> Pooneh Soltantabar,<sup>b</sup> Hanghang Wang,<sup>a</sup> Heejin Shin,<sup>a</sup> Alfonso Flores,<sup>a</sup> Michael C. Biewer,<sup>a</sup> and Mihaela C. Stefan<sup>a,b\*</sup>

<sup>a</sup> Department of Chemistry and Biochemistry, University of Texas at Dallas, Richardson, TX, USA, 75080

<sup>b</sup> Department of Bioengineering, University of Texas at Dallas, Richardson, TX, USA, 75080

\* Correspondence to Mihaela Stefan at [mihaela@utdallas.edu](mailto:mihaela@utdallas.edu)

## Supporting Information

**Materials.** All commercially available chemicals were obtained from Sigma-Aldrich or Fisher Scientific. Benzyl alcohol (BnOH) and tin (II) 2-ethyl hexanoate (Sn(Oct)<sub>2</sub>) were purified by vacuum distillation before use. All glassware used for polymerizations was kept in an oven heated at 120 °C for 24 h and cooled down in a desiccator before use. Polymerization reactions were performed under a nitrogen atmosphere.

**Instruments and Methods.** A Bruker AVANCE III (500 MHz) nuclear magnetic resonance (NMR) instrument was used to collect <sup>1</sup>H spectra using CdCl<sub>3</sub> as the solvent. ESI-MS were acquired using an Agilent 1100 HPLC with a PLRP-S column for separation and an ABSciex 4000 QTRAP system for detection. Size exclusion chromatography (SEC) measurements were obtained using a Shimadzu HPLC instrument equipped with an Agilent column connected to the Shimadzu refractive index detector with *N,N*-dimethylformamide (DMF) as eluent, and poly(methyl methacrylate) (PMMA) standard calibration. Matrix-assisted laser desorption/ionization time-of-flight (MALDI-ToF) mass spectrum was obtained using a Shimadzu Biotech Axima Confidence

instrument in linear mode with dithranol matrix and sodium trifluoromethanesulfonate salt. Differential scanning calorimetry (DSC) was performed on a Mettler Toledo DSC-1 under nitrogen at 40 mL/min. A temperature-controlled Cary5000 UV-vis spectrometer was used for the turbidimetric assay of the synthesized polymers. Fluorescence spectroscopy of the samples was performed using Biotek Synergy H4 96-well plate reader. The size and distribution of the particles were measured through dynamic light scattering (DLS) using the Malvern Zetasizer Nano ZS instrument equipped with a He-Ne laser (633 nm) and 173° backscatter detector. Transmission electron microscopy (TEM) analysis was conducted using a JEM-1400+ TEM (JEOL USA Inc., MA) with 2% phosphotungstic acid stain.

**Synthesis.**  $\gamma$ -ME<sub>2</sub>CL,  $\gamma$ -ME<sub>3</sub>CL, and  $\gamma$ -ME<sub>4</sub>CL monomers were synthesized according to the previously published procedure.<sup>1</sup>

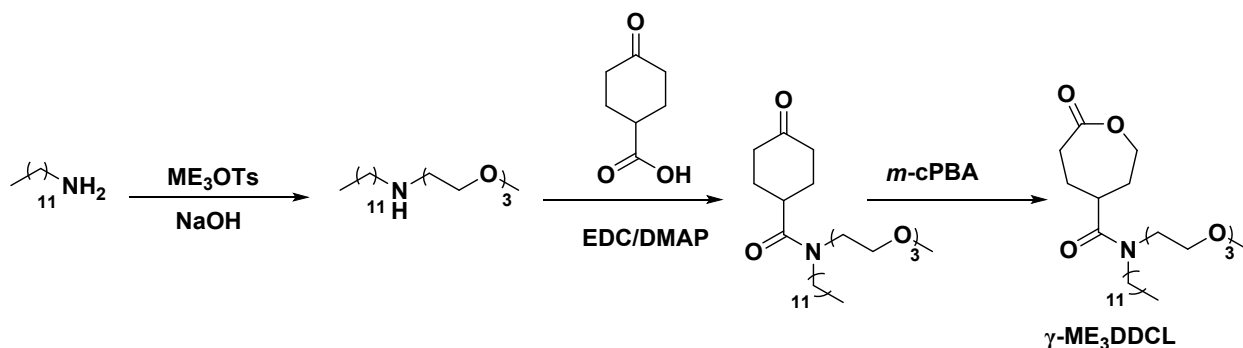

**Scheme S1.** Synthesis of  $\gamma$ -ME<sub>3</sub>DDCL monomer.

*Procedure for the synthesis of N-(2-(2-(2-methoxyethoxy)ethoxy)ethyl)dodecan-1-amine*

Methoxytriethylene glycol tosylate, ME<sub>3</sub>OTs (4.0 g, 12.6 mmol), which was synthesized following a previously published literature<sup>2</sup>, and dodecylamine (9.3 g, 50 mmol) were added into a flask, and the mixture was stirred at 120 °C overnight. The reaction mixture was allowed to cool at room

temperature, followed by the addition of NaOH (1.0 g, 25 mmol). The mixture was then stirred at 120 °C overnight, poured into water and extracted with chloroform. The product was isolated by chromatography using dichloromethane/methanol (2.8 g, 67% yield). <sup>1</sup>H NMR (500 MHz, CDCl<sub>3</sub>) δ: 0.85-0.87 (t, 3H), 1.22-1.33 (m, 18H), 1.45-1.52 (m, 2H), 2.35 (s, 1H), 2.58-2.61 (t, 3H), 2.77-2.82 (t, 2H), 3.39 (s, 3H), 3.54-3.69 (m, 10H). <sup>13</sup>C NMR (500 MHz, CDCl<sub>3</sub>) δ: 14.19, 22.77, 27.46, 29.43, 29.66, 29.69, 29.71, 29.72, 29.75, 30.00, 32.00, 49.30, 50.02, 59.12, 70.40, 70.43, 70.60, 70.61, 72.03.

*Procedure for the synthesis of N-dodecyl-N-(2-(2-(2-methoxyethoxy)ethoxy)ethyl)-4-oxocyclohexane-1-carboxamide*

4-oxocyclohexane-1-carboxylic acid (0.5 g, 3.3 mmol), N-(2-(2-(2-methoxyethoxy)ethoxy)ethyl)dodecan-1-amine (1.0 g, 3.0 mmol), 4-(dimethylamino)pyridine (DMAP) (0.2 g, 1.5 mmol), and dichloromethane were cooled to 0 °C in a round-bottom flask. A solution of 1-ethyl-3-(3-dimethylamino)-propylcarbodiimide hydrochloride (EDCI) (0.8 g, 4.0 mmol) in DCM was added dropwise to the cooled solution. The reaction was stirred overnight followed by evaporation of solvent *in vacuo*, then extraction with ethyl acetate. The product was isolated by chromatography using ethyl acetate (1.0 g, 73% yield). <sup>1</sup>H NMR (500 MHz, CDCl<sub>3</sub>) δ: 0.86-0.89 (t, 3H), 1.18-1.30 (m, 18H), 1.47-1.53 (m, 1H), 1.56-1.63 (m, 1H), 1.99-2.10 (m, 4H), 2.30-2.39 (m, 2H), 2.58-2.49 (m, 2H), 2.84-2.91/3.07-3.13 (m, 1H), 3.31-3.41 (m, 5H), 3.51-3.65 (m, 12H). <sup>13</sup>C NMR (500 MHz, CDCl<sub>3</sub>) δ: 14.20, 22.77, 26.95, 27.06, 27.81, 29.25, 29.28, 29.43, 29.50, 29.52, 29.68, 29.73, 32.00, 37.94, 38.19, 40.12, 40.16, 46.14, 46.27, 47.58, 49.35, 59.14, 69.43, 69.49, 70.51, 70.63, 70.67, 70.74, 70.82, 70.98, 72.01, 72.06, 174.37, 174.83, 210.24, 210.67.

*Procedure for the synthesis of N-dodecyl-N-(2-(2-(2-methoxyethoxy)ethoxy)ethyl)-7-oxoxepane-4-carboxamide ( $\gamma$ -ME<sub>3</sub>DDCL)*

A solution of *N*-dodecyl-*N*-(2-(2-(2-methoxyethoxy)ethoxy)ethyl)-4-oxocyclohexane-1-carboxamide (1.0 g, 2.2 mmol) in dichloromethane was added with a solution of 77% *m*-chloroperoxybenzoic acid (0.8 g, 3.7 mmol) in dichloromethane at 0°C. The reaction was stirred for 24 h then the solvent was evaporated *in vacuo*. The product was isolated by flash chromatography using hexane/ethyl acetate (0.8 g, 80% yield). <sup>1</sup>H NMR (500 MHz, CDCl<sub>3</sub>)  $\delta$ : 0.86-0.90 (t, 3H), 1.20-1.33 (m, 18H), 1.45-1.58 (m, 2H), 1.87-2.15 (m, 4H), 2.56-2.66 (m, 1H), 2.77-2.84/3.03-3.10 (m, 1H), 2.85-2.97 (m, 1H), 3.22-3.41 (m, 5H), 3.42-3.66 (m, 12H), 4.15-4.23 (m, 1H), 4.44-4.56 (m, 1H). <sup>13</sup>C NMR (500 MHz, CDCl<sub>3</sub>)  $\delta$ : 14.22, 22.79, 25.70, 25.76, 26.94, 27.06, 27.78, 29.45, 29.49, 29.52, 29.69, 29.71, 29.74, 28.80, 32.02, 32.20, 32.28, 32.43, 32.53, 40.87, 40.94, 46.12, 46.18, 47.66, 49.37, 59.16, 66.97, 67.21, 69.25, 69.41, 70.52, 70.63, 70.67, 70.73, 70.77, 72.02, 72.07, 173.99, 174.58, 175.30, 175.64. The *m/z* obtained from ESI-MS is 494.01 [M+Na<sup>+</sup>], while the calculated *m/z* ([M+H]<sup>+</sup>) is 471.36 (C<sub>26</sub>H<sub>49</sub>NO<sub>6</sub>).

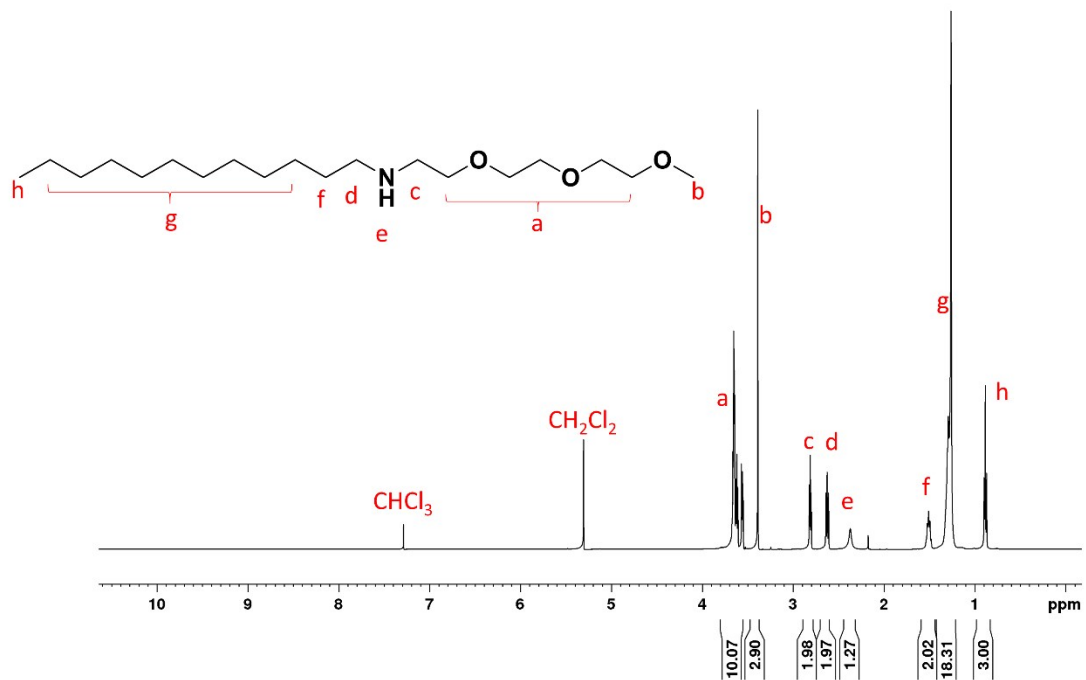

**Figure S1.** <sup>1</sup>H NMR spectrum of *N*-(2-(2-(2-methoxyethoxy)ethoxy)ethyl)dodecan-1-amine.

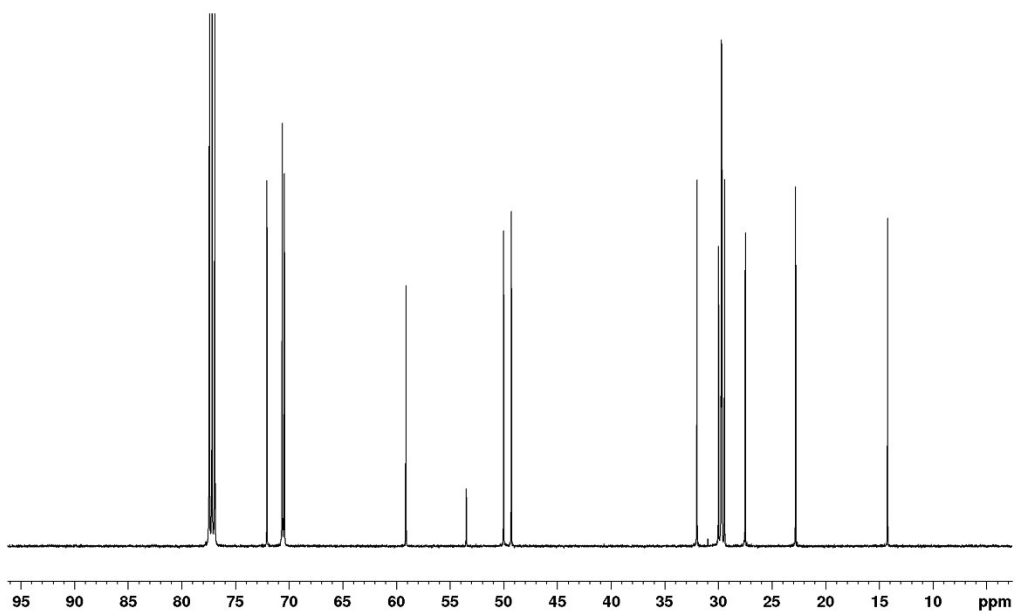

**Figure S2.** <sup>13</sup>C NMR spectrum of *N*-(2-(2-(2-methoxyethoxy)ethoxy)ethyl)dodecan-1-amine.

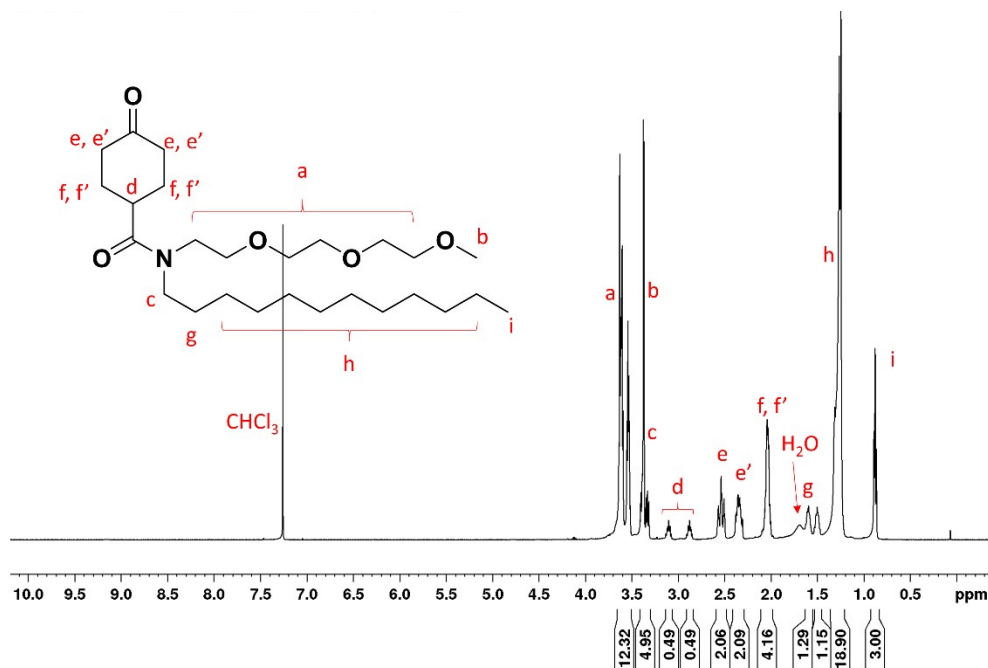

**Figure S3.**  $^1\text{H}$  NMR spectrum of *N*-dodecyl-*N*-(2-(2-(2-methoxyethoxy)ethoxy)ethyl)-4-oxocyclohexane-1-carboxamide.

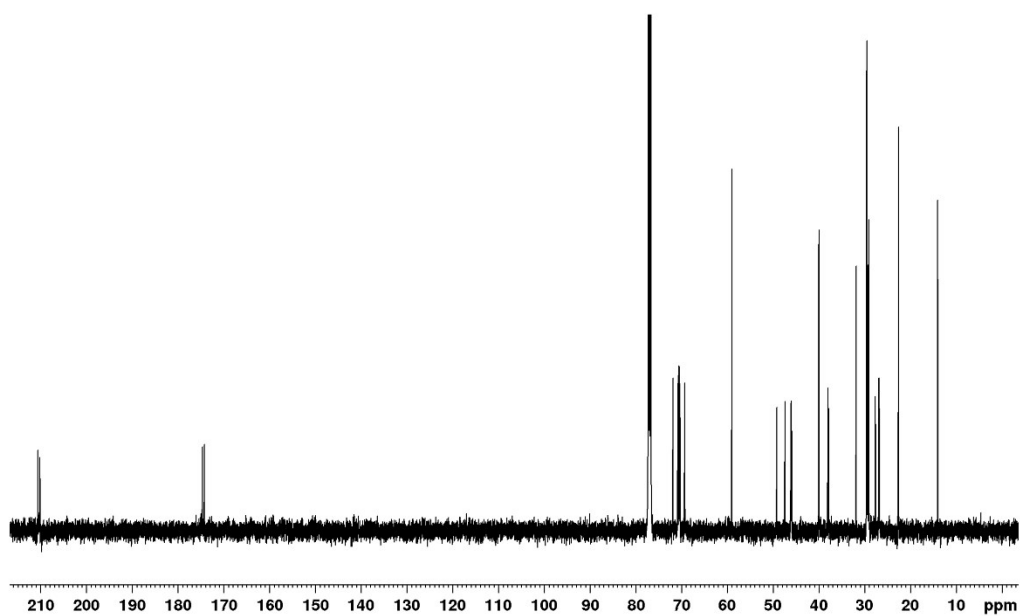

**Figure S4.**  $^{13}\text{C}$  NMR spectrum of *N*-dodecyl-*N*-(2-(2-(2-methoxyethoxy)ethoxy)ethyl)-4-oxocyclohexane-1-carboxamide.

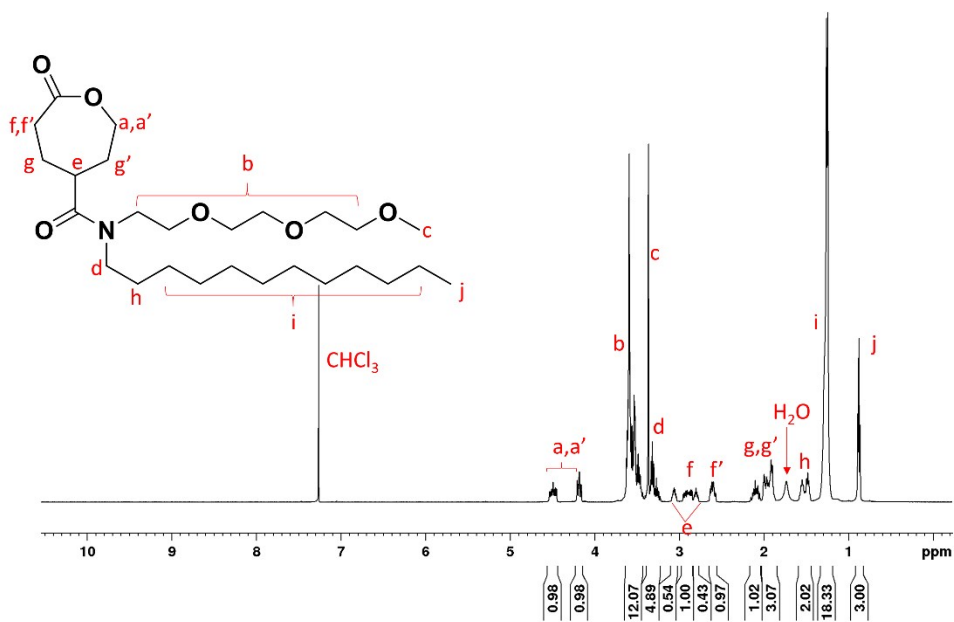

**Figure S5.** <sup>1</sup>H NMR spectrum of N-dodecyl-N-(2-(2-(2-methoxyethoxy)ethoxy)ethyl)-7-oxoxepane-4-carboxamide ( $\gamma$ -ME<sub>3</sub>DDCL).

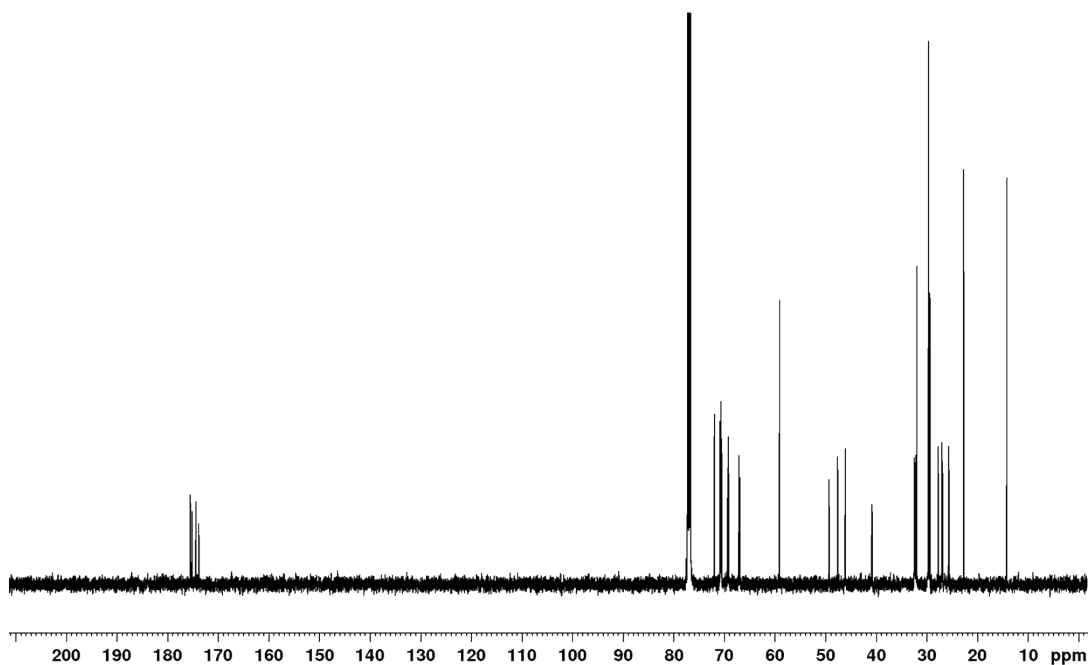

**Figure S6.** <sup>13</sup>C NMR spectrum of N-dodecyl-N-(2-(2-(2-methoxyethoxy)ethoxy)ethyl)-7-oxoxepane-4-carboxamide ( $\gamma$ -ME<sub>3</sub>DDCL).

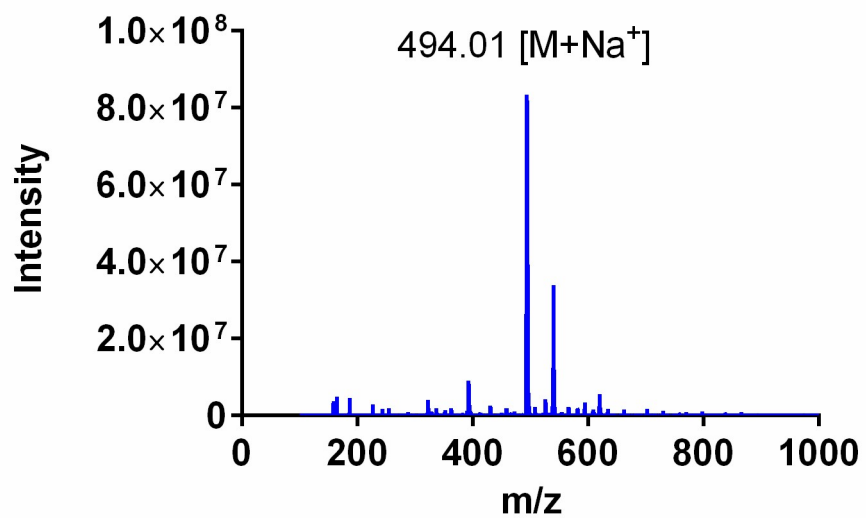

**Figure S7.** ESI-MS spectrum N-dodecyl-N-(2-(2-(2-methoxyethoxy)ethoxy)ethyl)-7-oxoxepane-4-carboxamide ( $\gamma$ -ME<sub>3</sub>DDCL).



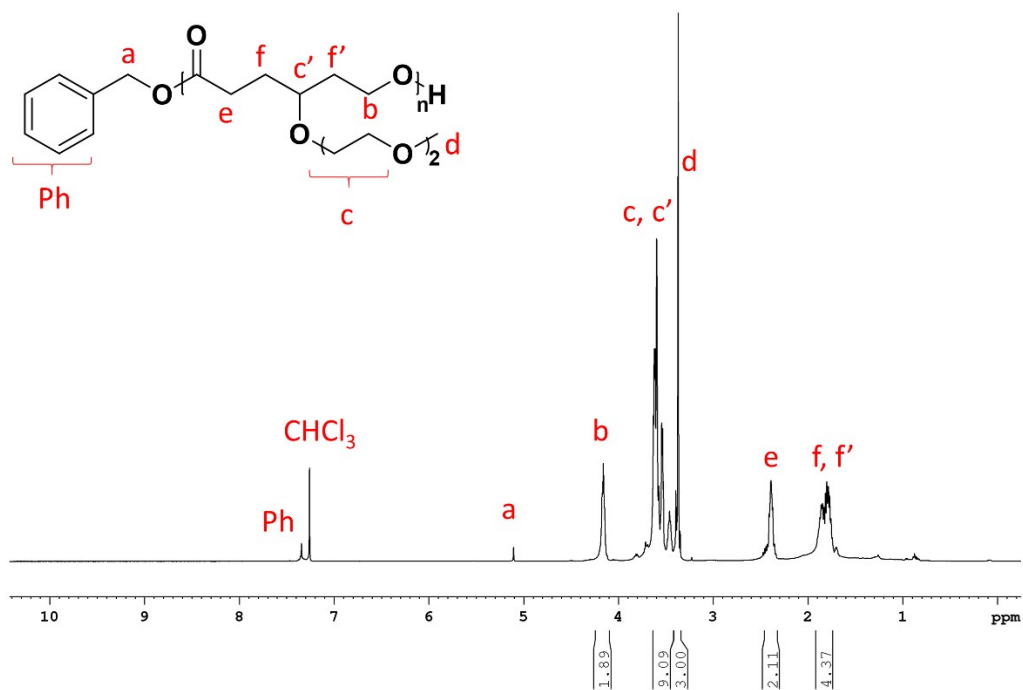

**Figure S8.**  $^1\text{H}$  NMR spectrum of **P1b** (representative spectra of poly( $\gamma$ -2-(2-methoxyethoxy)ethoxy- $\epsilon$ -caprolactone), PME<sub>2</sub>CL).

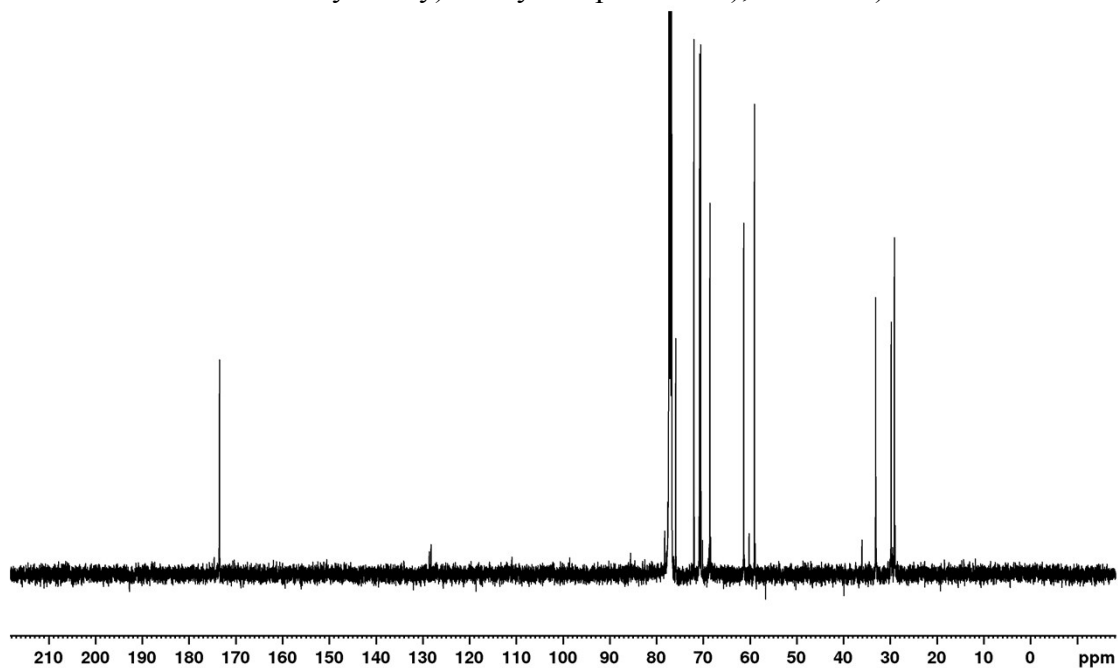

**Figure S9.**  $^{13}\text{C}$  NMR spectrum of **P1b** (representative spectra of poly( $\gamma$ -2-(2-methoxyethoxy)ethoxy- $\epsilon$ -caprolactone), PME<sub>2</sub>CL).

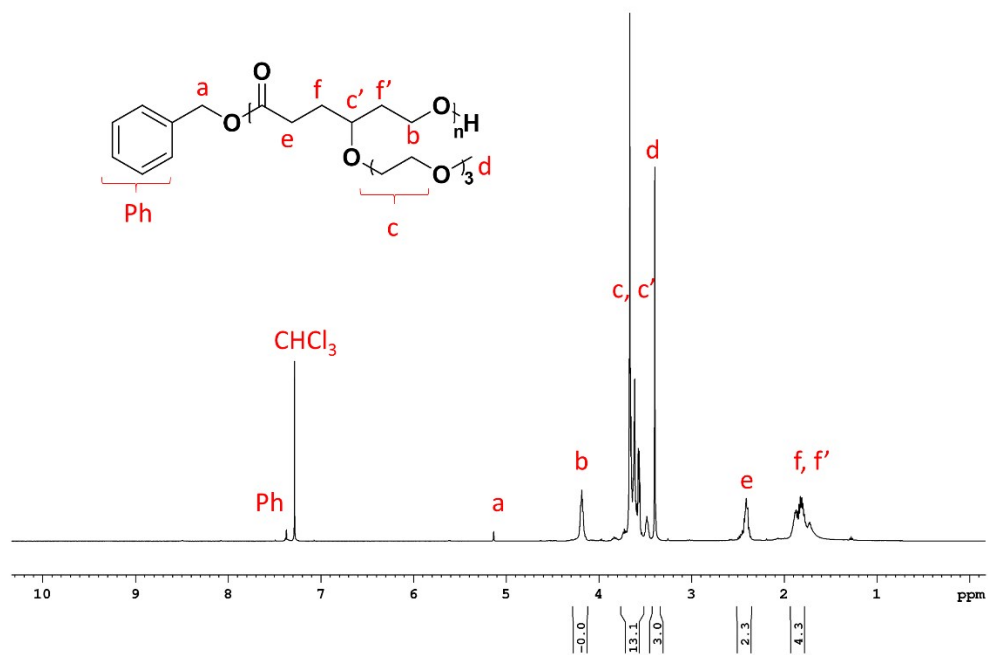

**Figure S10.**  $^1\text{H}$  NMR spectrum of **P2b** (representative spectra of poly( $\gamma$ -2-(2-(2-methoxyethoxy)ethoxy)ethoxy- $\epsilon$ -caprolactone),  $\text{PME}_3\text{CL}$ ).

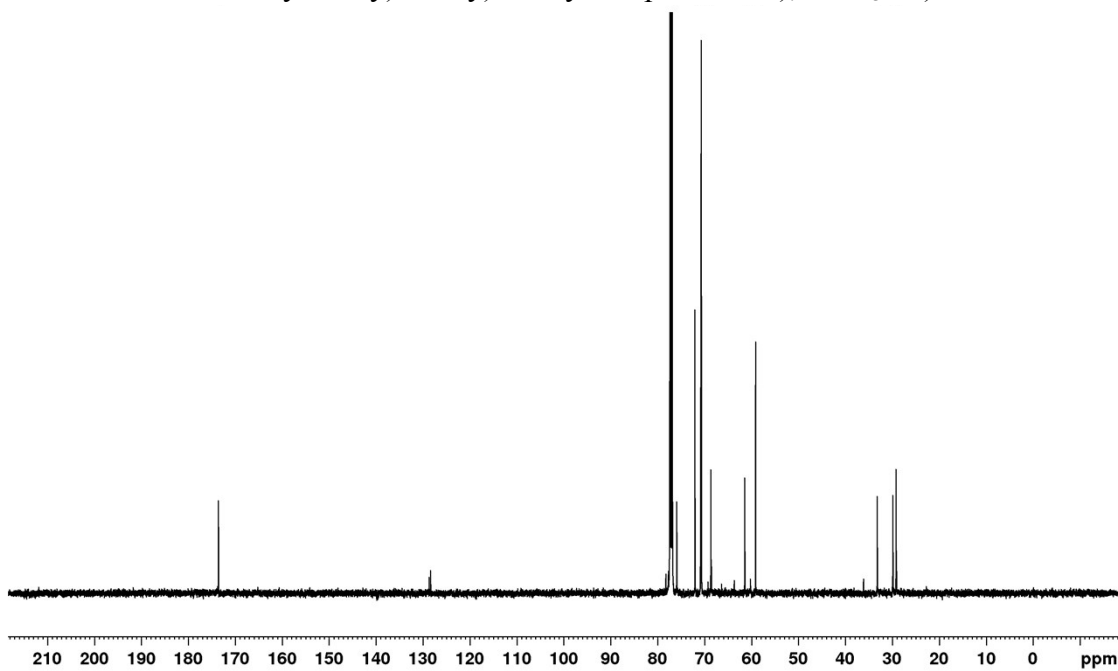

**Figure S11.**  $^{13}\text{C}$  NMR spectrum of **P2b** (representative spectra of poly( $\gamma$ -2-(2-(2-methoxyethoxy)ethoxy)ethoxy- $\epsilon$ -caprolactone),  $\text{PME}_3\text{CL}$ ).

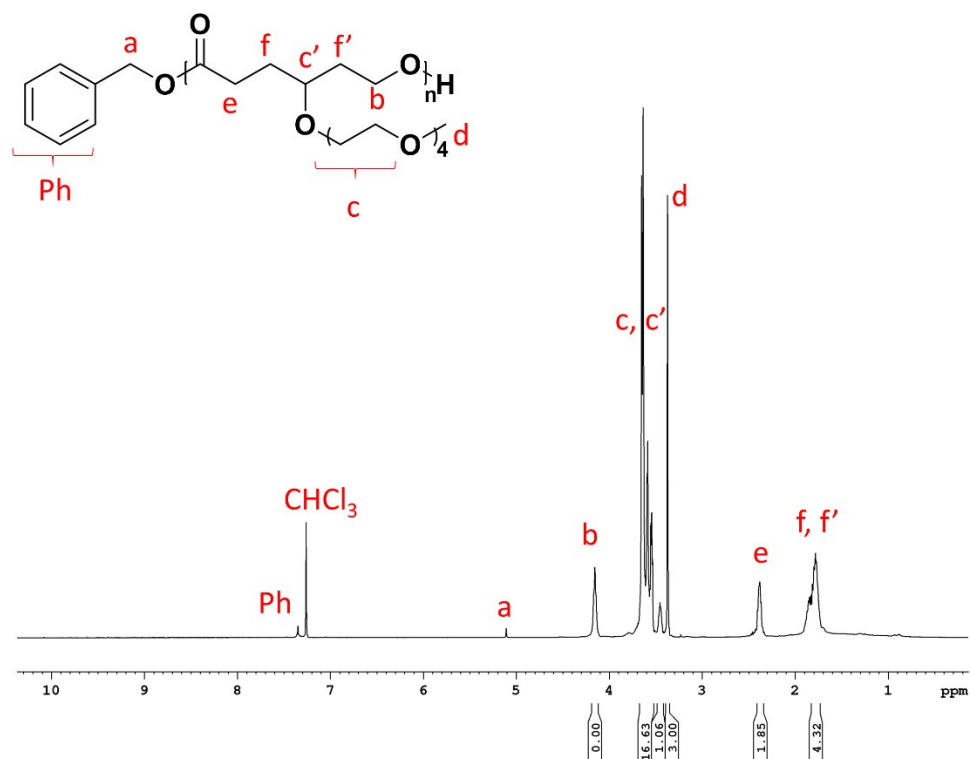

**Figure S12.** <sup>1</sup>H NMR spectrum of **P3b** (representative spectra of poly( $\gamma$ -2-(2-(2-(2-methoxyethoxy)ethoxy)ethoxy)ethoxy)- $\epsilon$ -caprolactone, PME<sub>4</sub>CL).

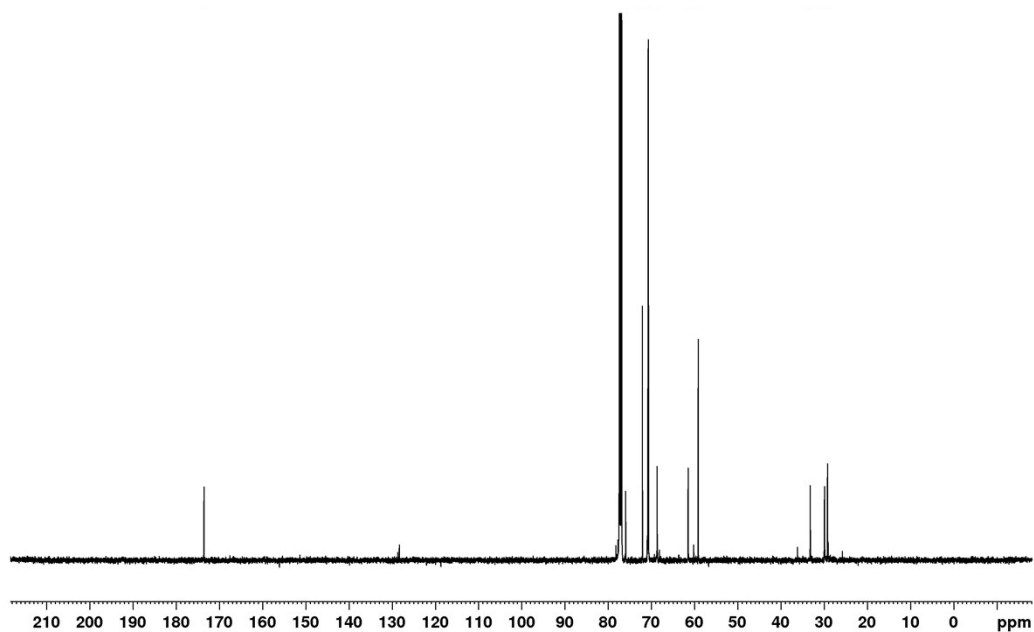

**Figure S13.** <sup>13</sup>C NMR spectrum of **P3b** (representative spectra of poly( $\gamma$ -2-(2-(2-(2-methoxyethoxy)ethoxy)ethoxy)ethoxy)- $\epsilon$ -caprolactone, PME<sub>4</sub>CL).

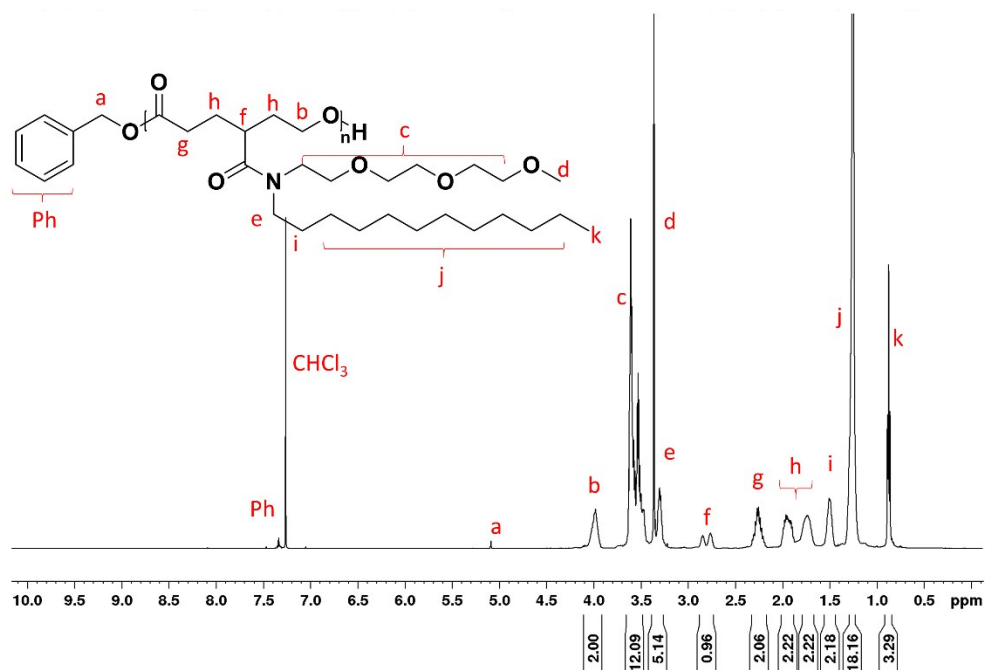

**Figure S14.** <sup>1</sup>H NMR spectrum of **P4** (poly(*N*-dodecyl-*N*-(2-(2-(2-methoxyethoxy)ethoxy)ethyl)-7-oxoxepane-4-carboxamide)),  $\text{PME}_3\text{DDCL}$ .

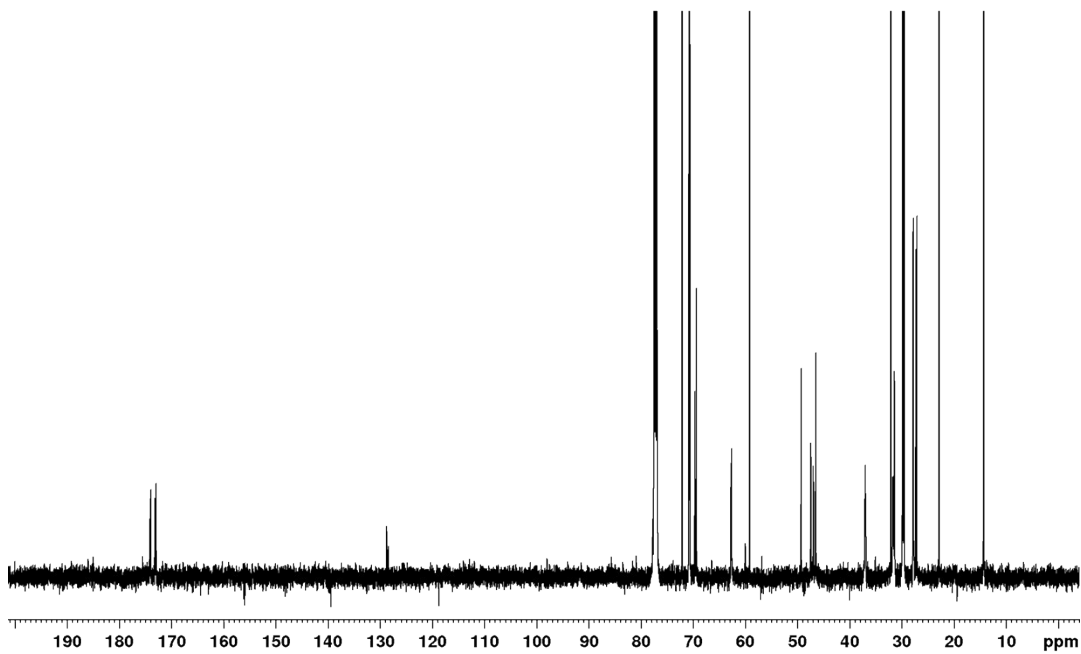

**Figure S15.** <sup>13</sup>C NMR spectrum of **P4** (poly(*N*-dodecyl-*N*-(2-(2-(2-methoxyethoxy)ethoxy)ethyl)-7-oxoxepane-4-carboxamide)),  $\text{PME}_3\text{DDCL}$ .

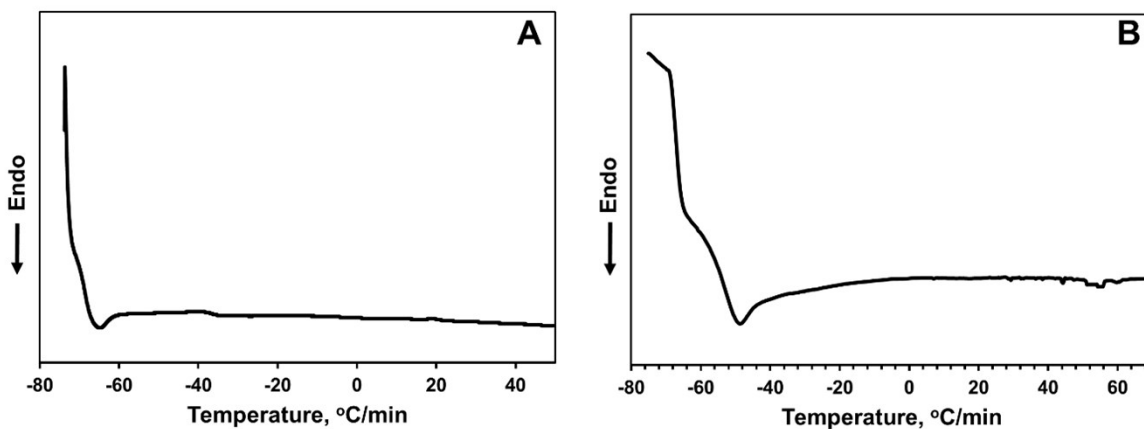

Figure S16. DSC thermograms of PME<sub>3</sub>CL (P2c) (A) and PME<sub>3</sub>DDCL (P4) (B).

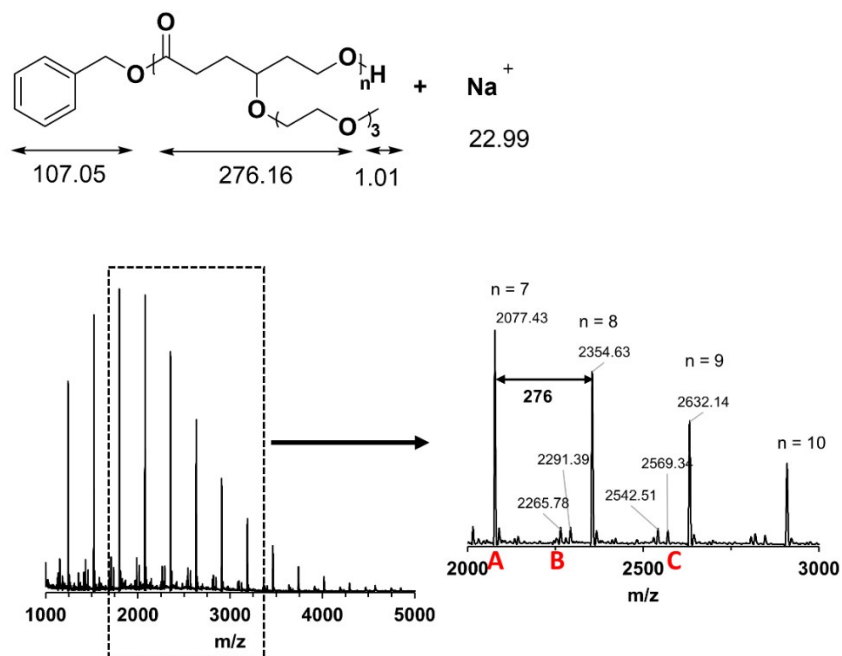

Figure S17. MALDI-ToF mass spectrum of the synthesized PME<sub>3</sub>CL (P2a), mole ratio  $\gamma$ -ME<sub>3</sub>CL: BnOH: Sn(Oct)<sub>2</sub> = 25:1:1

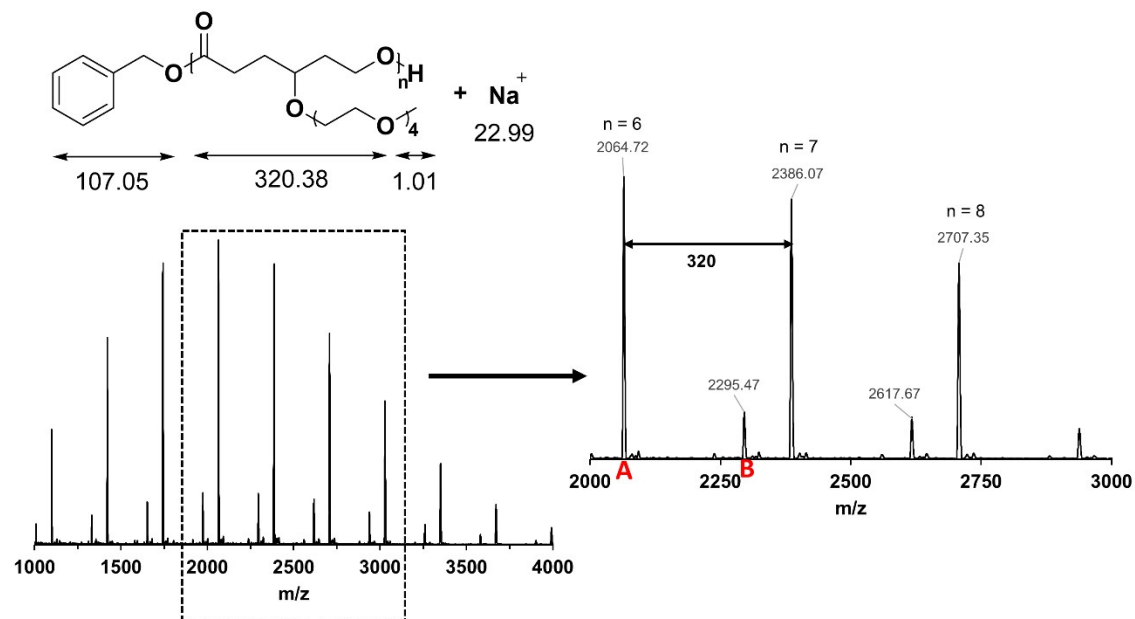

**Figure S18.** MALDI-ToF mass spectrum of the synthesized PME<sub>4</sub>CL (P3a), mole ratio  $\gamma$ -ME<sub>4</sub>CL:BnOH:Sn(Oct)<sub>2</sub> = 25:1:1

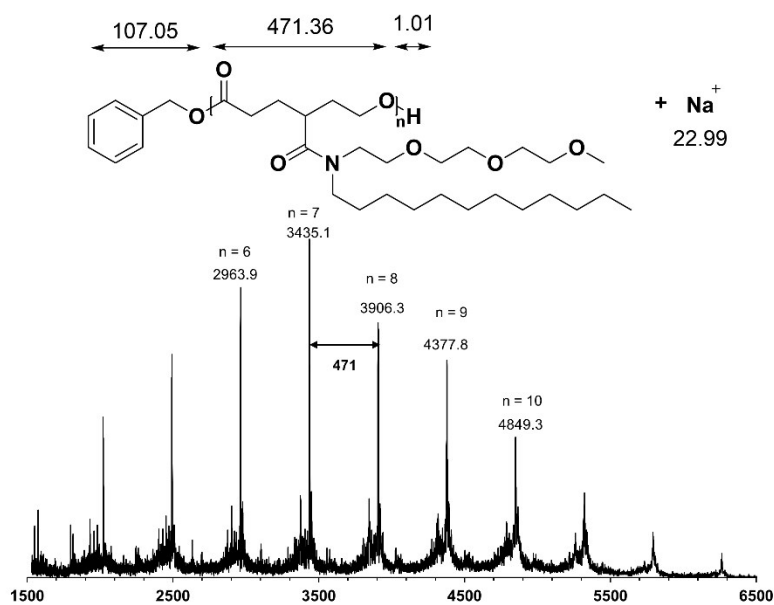

**Figure S19.** MALDI-ToF mass spectrum of the synthesized PME<sub>3</sub>DDCL, mole ratio  $\gamma$ -ME<sub>3</sub>DDCL:BnOH:Sn(Oct)<sub>2</sub> = 15:1:1

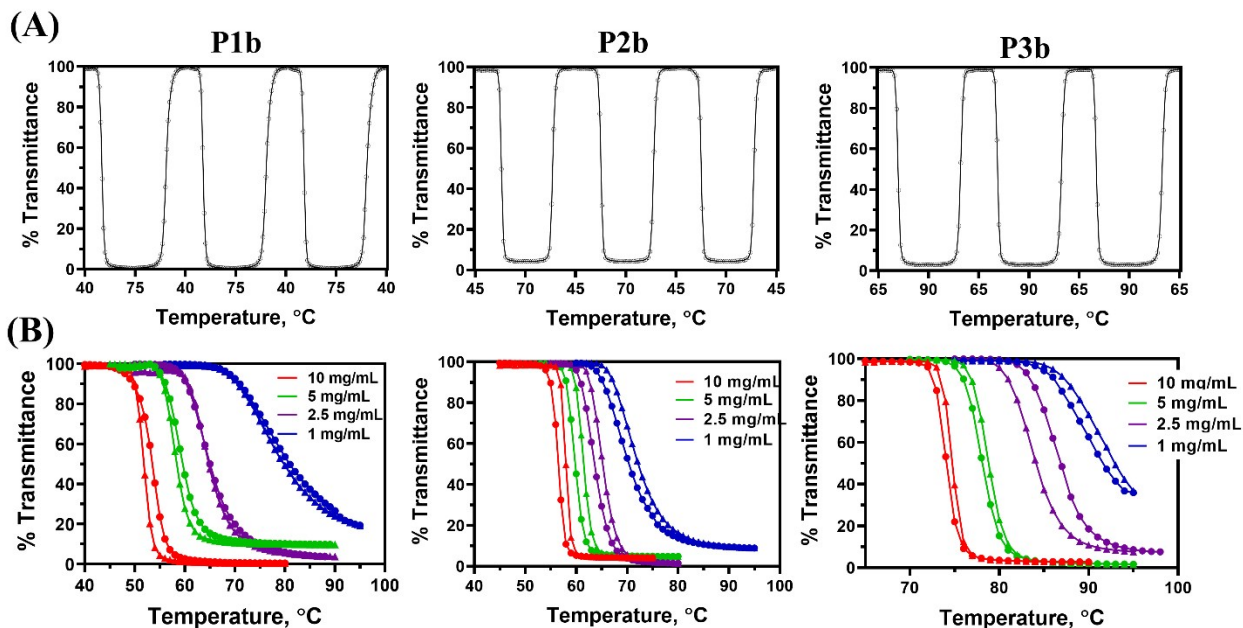

**Figure S20.** (A) Turbidity curves obtained from an aqueous solution of the polymers (10 mg/mL) after multiple heating and cooling cycles; (B) Dependence of  $T_{cp}$  on the polymer concentration ( $\Delta$  is heating and  $\circ$  is cooling).

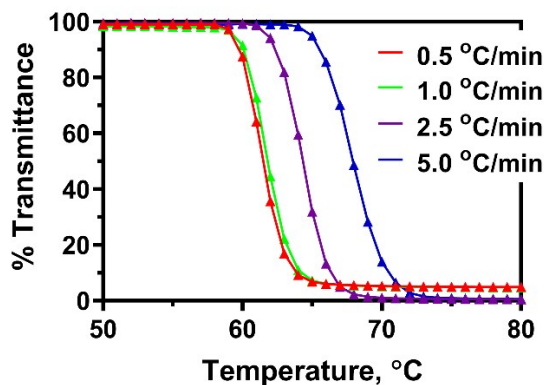

**Figure S21.** Effect of various heating rates on the  $T_{cp}$  of an aqueous solution of PME<sub>3</sub>CL (P2b) (5 mg/mL).

1. Soltantabar, P.; Calubaquib, E. L.; Mostafavi, E.; Biewer, M. C.; Stefan, M. C. Enhancement of Loading Efficiency by Coloaded of Doxorubicin and Quercetin in Thermoresponsive Polymeric Micelles. *Biomacromolecules* **2020**, 21 (4), 1427-1436 DOI: 10.1021/acs.biomac.9b01742.
2. Hao, J.; Servello, J.; Sista, P.; Biewer, M. C.; Stefan, M. C. Temperature-sensitive aliphatic polyesters: synthesis and characterization of  $\gamma$ -substituted caprolactone monomers and polymers. *J. Mater. Chem.* **2011**, 21 (29), 10623-10628 DOI: 10.1039/C1JM11288K.
